# Supplementary material for: Induced Mutation in GmCOP1b Enhances the Performance of Soybean under Dense Planting Conditions
Source: MDPI journal article supplement (doi:10.3390/ijms23105394), 2022-05-12
Supplement: s1 [file s1]

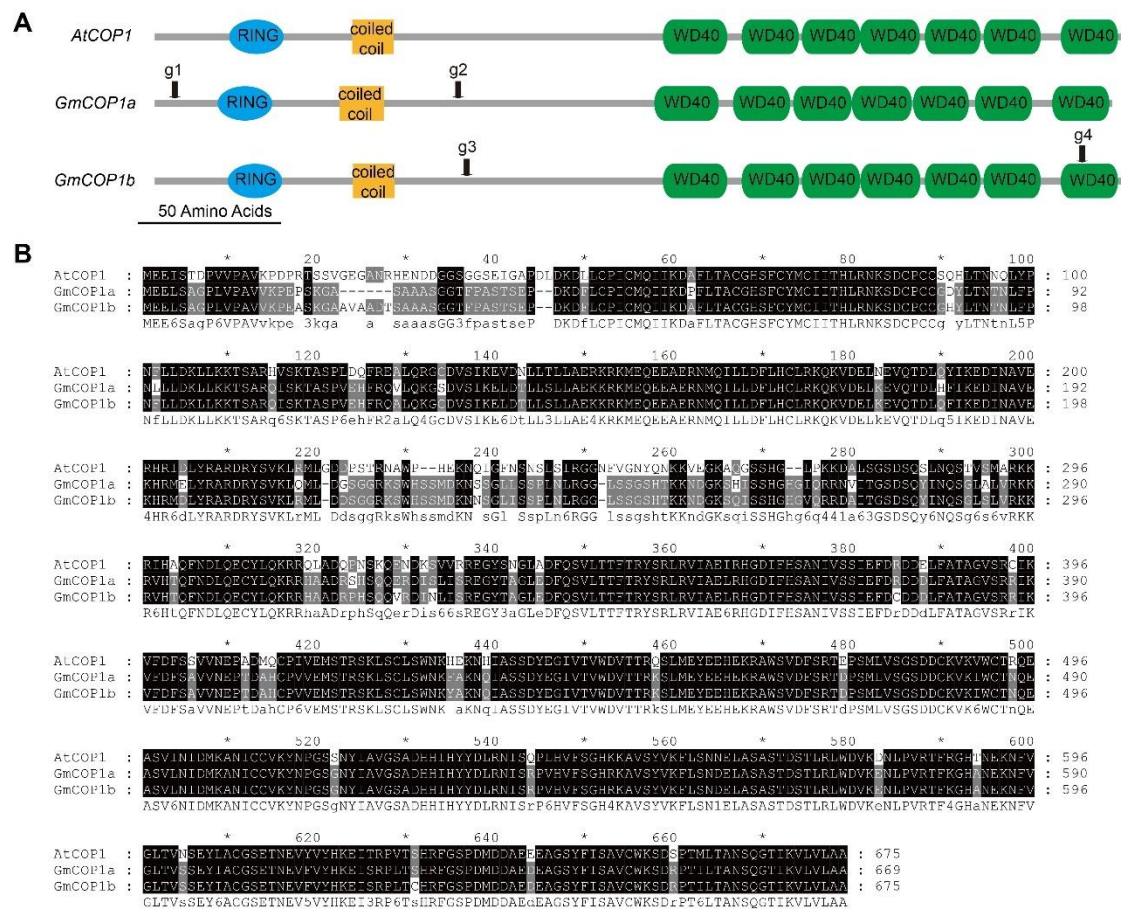

**Figure S1.** Structure and sequence alignment of COP1 proteins in Arabidopsis and soybean

(A) Schematic diagram of AtCOP1, GmCOP1a, and GmCOP1b proteins. g1 to g4 indicate the editing sites. Scale bar = 50 amino acids. (B) Protein sequence alignment of AtCOP1, GmCOP1a, and GmCOP1b.

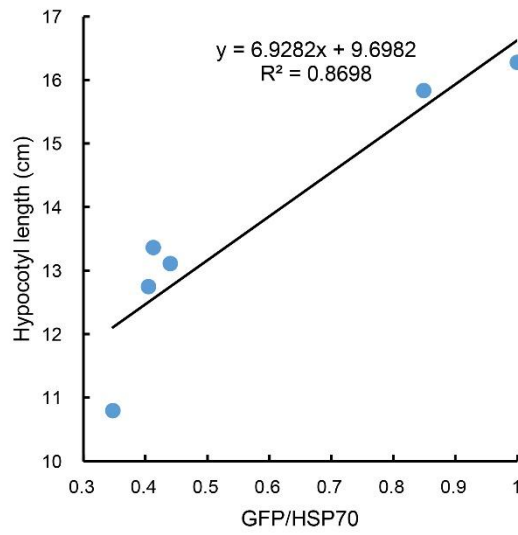

**Figure S2.** Correlation analysis between the hypocotyl length and protein level of indicated lines in Figure 1B.

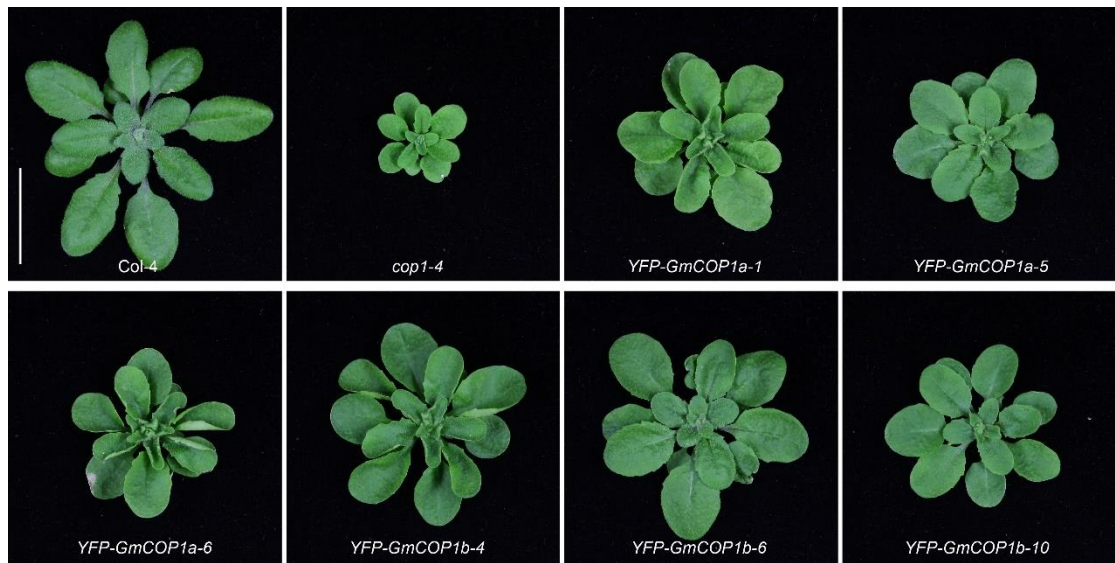

**Figure S3.** Representative images of indicated lines at vegetative stage

Plants were grown under long-day (16 h light/8 h dark) conditions for 28 days. Scale bar = 2 cm.

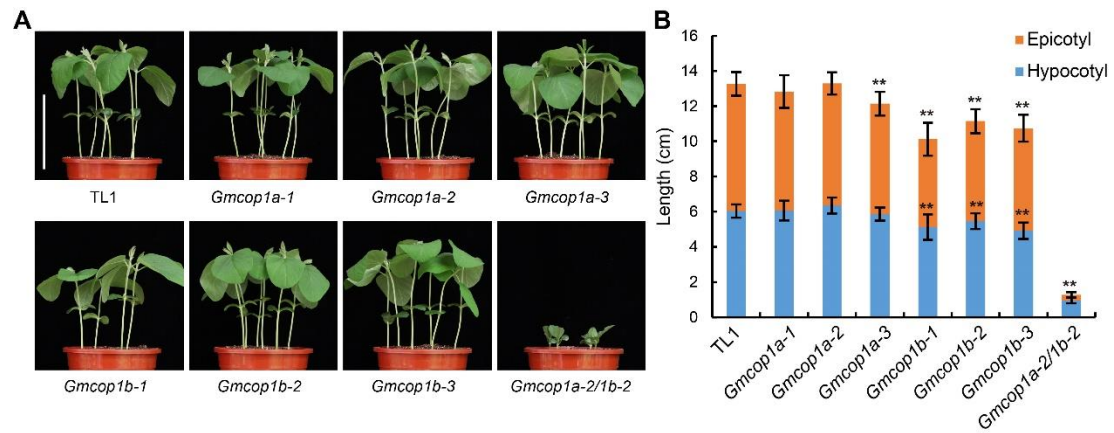

**Figure S4.** Seedling status of indicated *Gmcp1* mutant lines grown under long-day conditions (A) Representative images of different mutants grown under long-day (16 h light/8 h dark) conditions for 10 days. Scale bar = 10 cm. (B) Statistical analysis of hypocotyl and epicotyl lengths in (A). The values represent the means  $\pm$  SD ( $n \geq 10$ ), asterisks indicate significant differences compared to TL1 by Student's *t*-test (\*\*  $P < 0.01$ ).

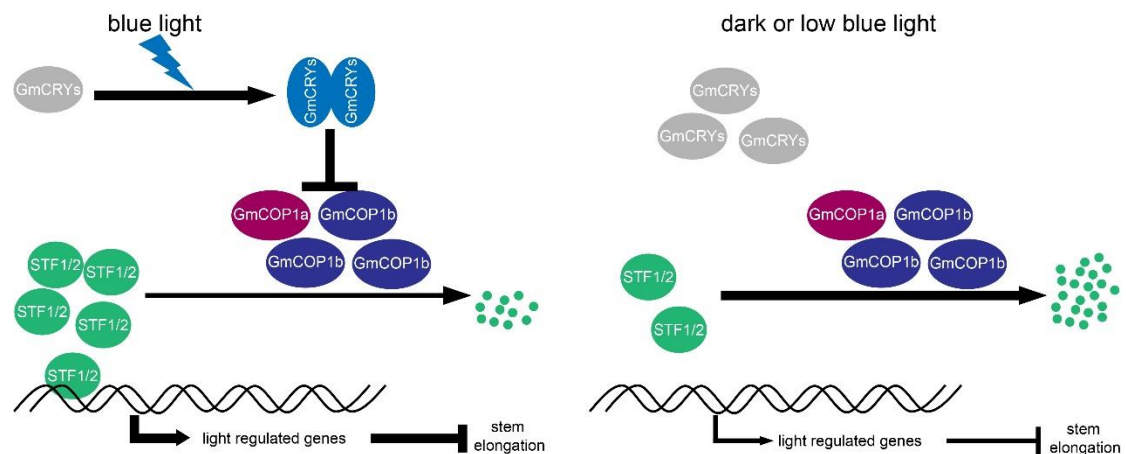

**Figure S5.** A model for the regulation of stem elongation by GmCOP1s in soybean under dark or LBL conditions

Under light conditions, light-activated GmCRYs inhibit the activity of GmCOP1s, promote the accumulation of STF1/2 proteins which regulate the transcriptions of downstream light-regulated genes to inhibit soybean stem elongation. In the dark or LBL conditions, GmCRYs are deactivated and release the activity of GmCOP1s to degrade the STF1/2 proteins. Therefore, GmCOP1s negatively regulate the expression of light-regulated genes and promote stem elongation.

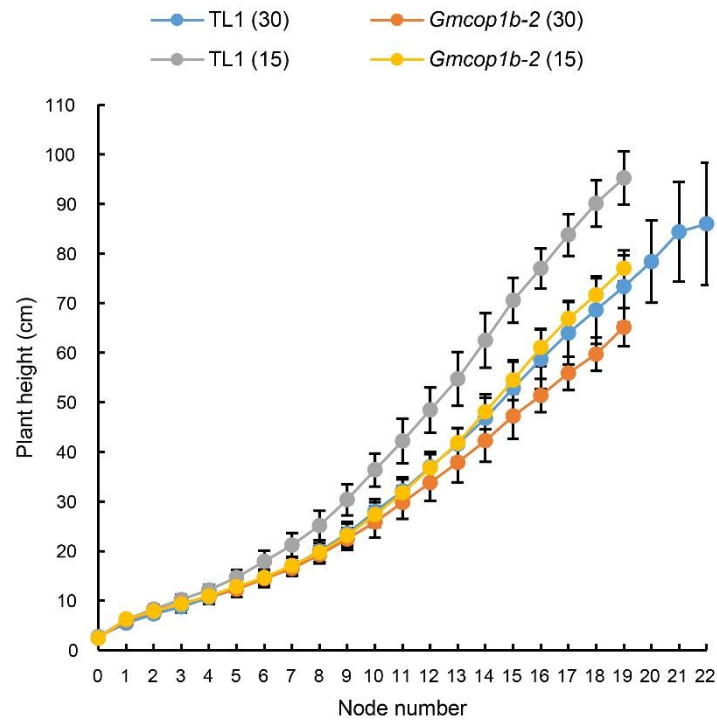

**Figure S6.** Statistical analysis of each internode length of indicated lines under different planting density in field

The values represent the means  $\pm$  SD ( $n \geq 8$ ). Numbers in the brackets indicate the plant spacing, the unit is cm.

**Table S1. Primer sequences used in this study**

| <b>Overexpression<br/>plasmids</b> | primer sequence (5'-3')                                        |
|------------------------------------|----------------------------------------------------------------|
| YFP-GmCOP1a-F                      | GTGGGGACAAGTTTGTACAAAAAAGCAGGCTTCATGGAAGAGCTCTCAGCGGG          |
| YFP-GmCOP1a-R                      | GTGGGGACCACTTTGTACAAGAAAGCTGGGTCAGCTGCAAGCACCAGCACTT           |
| YFP-GmCOP1b-F                      | GTGGGGACAAGTTTGTACAAAAAAGCAGGCTTCATGGAAGAGCTCTCCGCGGG          |
| YFP-GmCOP1b-R                      | GTGGGGACCACTTTGTACAAGAAAGCTGGGTCAGCTGCAAGCACCAGCACTT           |
|                                    |                                                                |
| <b>CRISPR plasmids</b>             | primer sequence (5'-3')                                        |
| GmU6-F                             | GCTTAGGCCTTCTAGAAAAATAAATGGTAAATGTCAA                          |
| GmU6-R                             | AATCCATGTGGTGGCACATTTTC                                        |
| S1-sgRNA-F                         | AATGTGCCACCACATGGATTGGGTTCAGGTTTGACGACGGGTTTTAGAGCTAGAAATAGCAA |
| S2-sgRNA-F                         | AATGTGCCACCACATGGATTGTGCAGATGCTTGACGGTTCGTTTTAGAGCTAGAAATAGCAA |
| S3-sgRNA-F                         | AATGTGCCACCACATGGATTGTACGGATGCTTGACGACTCGTTTTAGAGCTAGAAATAGCAA |
| S4-sgRNA-F                         | AATGTGCCACCACATGGATTGCTTCATTAGTGCTGTATGCGTTTTAGAGCTAGAAATAGCAA |
| scaffold-R                         | TCGCAACGCGTTCTAGAAAAAAAAGCACCGACTCGGT                          |
|                                    |                                                                |
| <b>Genotyping</b>                  | primer sequence (5'-3')                                        |
| S1-F                               | CCCCAATTCGAAGCAAA                                              |
| S1-R                               | GCAACAAGTTAGGGAAGAGGT                                          |
| S2-F                               | GTACAAACTGATCTCCACTTTAT                                        |
| S2-R                               | GCACCCTCTTCTTTCTAACT                                           |

|              |                          |
|--------------|--------------------------|
| S3-F         | TGGTGTTCGTGCTTTC         |
| S3-R         | GCAATATGGCATCTGCT        |
| S4-F         | TGTGGCAGTGAAACAAAT       |
| S4-R         | GTTCAGTCCCTTAAATAGGT     |
| BAR-F        | TCCGCAGCCATTAACGACTT     |
| BAR-R        | ACAGATAAAGCCACGCACATT    |
| CAS9-F       | CAGCTCGTCCAAACCTAC       |
| CAS9-R       | CTGTGCCATCCATCTTCT       |
| GmU6-sgRNA-F | GCGGTGTCATCTATGTTACTA    |
| GmU6-sgRNA-R | TTCAAGTTGATAACGGACTA     |
|              |                          |
| <b>qPCR</b>  | primer sequence (5'-3')  |
| GmCOP1a-qF   | GCGATTGCCCTTGCTGCGGCG    |
| GmCOP1a-qR   | ATACCTGCCGAAAATGTTTCG    |
| GmCOP1b-qF   | GCGATTGCCCTTGCTGCGGCC    |
| GmCOP1b-qR   | ATGCCTGCCGAAAATGTTCC     |
| GmACT11-qF   | ATCTTGACTGAGCGTGGTTATTCC |
| GmACT11-qR   | GCTGGTCCTGGCTGTCTCC      |
